# Supplementary material
Source: HighWire-hosted journal article supplement (doi:10.1101/rna.070292.119)
Supplement: Supplemental_TableS1.docx [file Supplemental_TableS1.docx]

**Genes with intronic enhancers chosen for expression analysis**

| GENE | mRNA FC  *zfp-1(ok554)*/wt | mRNA FC  *dot-1.1(gk105059)*/wt | GRO-seq FC *zfp-1(ok554)*/wt (sense) | GRO-seq FC *zfp-1(ok554)*/wt (antisense) | Gene description | Primers |
| --- | --- | --- | --- | --- | --- | --- |
| F49E12.12 | 0.641 | 0.686 | 0.674 | 1.390 | An ortholog of human PGAP2.  The protein encoded by Human PGAP2 plays a role in the maturation of glycosylphosphatidylinositol (GPI) anchors on GPI-anchored proteins. Mutations in this gene are associated with an autosomal recessive syndrome characterized by hyperphosphatasia and intellectual disability. ([http://www.wormbase.org/db/get?name= WBGene00009904#01-9ga-3;class=Gene](http://www.wormbase.org/db/get?name=%20WBGene00009904%2301-9ga-3;class=Gene)) | Exon 2-3 junction: F: CTTCGAAGGATGACCTTTTCA  R: ATCCATTTGCTTGGGTTTTG  Exon 5-6 junction: F: CCGAGTCCTGGAACGAGTAT  R: GGCCATTCCGTGTGATATAAA |
| odr-2 | 0.779 | 0.752 | 0.505 | 2.720 | Involved in olfactory behavior and response to odorant; localizes to the axon, extrinsic component of plasma membrane, and neuronal cell body; is expressed in the head, the nervous system, and the sensillum.([http://www.wormbase.org/db/get?name= WBGene00003849#01-9ga-3;class=Gene](http://www.wormbase.org/db/get?name=%20WBGene00003849#01-9ga-3;class=Gene)) | F: CAATTCGGCACTACGTCTACC  R: CGCAATGAGTGTCGAAAGAA |
| sdpn-1 | 0.813 | 0.787 | 2.712 | 1 | Ortholog of human PACSIN1 (protein kinase C and casein kinase substrate in neurons 1), PACSIN2 (protein kinase C and casein kinase substrate in neurons 2), and PACSIN3 (protein kinase C and casein kinase substrate in neurons 3); is involved in endocytic recycling; localizes to the early endosome and recycling endosome membrane; is expressed in the intestine and the pharynx.([http://www.wormbase.org/db/get?name= WBGene00018467#01-9ga-3;class=Gene](http://www.wormbase.org/db/get?name=%20WBGene00018467#01-9ga-3;class=Gene)) | F: TACAGCAAGATGCTCTCTCAACA  R: CGCTTACATCATCAATCAAACAA |
| lat-2 | 0.855 | 0.912 | 0.875 | 1.436 | An ortholog of human ADGRL1 (adhesion G protein-coupled receptor L1) and ADGRL2 (adhesion G protein-coupled receptor L2); exhibits endopeptidase activity; is involved in self proteolysis; is expressed in the excretory cell and the pharynx. ([http://www.wormbase.org/db/get?name= WBGene00002252#01-9ga-3;class=Gene](http://www.wormbase.org/db/get?name=%20WBGene00002252#01-9ga-3;class=Gene)) | F: TGTGCACCATCCTAAAATACACA  R: TCTTTGGGTAGATGCTTGTTGAT |
| syd-1 | 0.635 | 0.751 | 1.282 | 1.239 | Involved in activation of GTPase activity, axo-dendritic transport, and cell projection organization; localizes to the presynaptic membrane; is expressed in the nerve ring and the nervous system. ([http://www.wormbase.org/db/get?name= WBGene00006363#01-9ga-3;class=Gene](http://www.wormbase.org/db/get?name=%20WBGene00006363#01-9ga-3;class=Gene)) | F:  GACCATTGAGCAGAAGTTCAAGT  R:  ACAAATGCTTCCAAAAGTTTCAG |
| unc-104 | 0.605 | 0.554 | 0.886 | 1.779 | An ortholog of human KIF1A (kinesin 1A) and KIF1B (kinesin 1B); exhibits ATP-dependent microtubule motor activity, plus-end-directed, cytoskeletal protein binding activity, and phosphatidylinositol phosphate binding activity; is involved in several processes, including chemical synaptic transmission, nervous system development, and regulation of intracellular transport; localizes to several cellular components, including the neuron projection, neuronal cell body, and presynapse; is expressed in the amphid sensillum, the head, and the nervous system. ([http://www.wormbase.org/db/get?name= WBGene00006831#01-9ga-3;class=Gene](http://www.wormbase.org/db/get?name=%20WBGene00006831#01-9ga-3;class=Gene)) | F: ATGTTGGAACACGCATTTGA  R: AATCATTGCACAAACGTGGA |
| ret-1 | 0.788 | 0.873 | 0.861 | 1.875 | An ortholog of human RTN3 and RTN4; localizes to the endomembrane system; is expressed in several tissues, including the nervous system and the reproductive system.  ([http://www.wormbase.org/db/get?name= WBGene00004336#01-9ga-3;class=Gene](http://www.wormbase.org/db/get?name=%20WBGene00004336#01-9ga-3;class=Gene)) | F:  GTTAATATTGTGCTCCGAGTTGG  R: TTTCACCGTTCTAAAGGTTCTCA |
| rig-1 | 0.816 | 0.985 | 0.699 | 1.126 | Expressed in several tissues, including the amphid sensillum, the epithelial system, the nervous system, and the pharyngeal muscle cell; is predicted to encode a protein with the following domains: Immunoglobulin subtype 2, Immunoglobulin subtype, Fibronectin type III, Immunoglobulin I-set, Immunoglobulin-like fold, Fibronectin type III superfamily, and Immunoglobulin-like domain superfamily.([http://www.wormbase.org/db/get?name= WBGene00004369#01-9ga-3;class=Gene](http://www.wormbase.org/db/get?name=%20WBGene00004369#01-9ga-3;class=Gene)) | F: AGTTGTATGGCTGAAAGATCGAG  R: TTTTGAGGTCGAGTTCCATGTAT |
